# Supplementary material
Source: PubMed Central journal article supplement (PMC3393791)

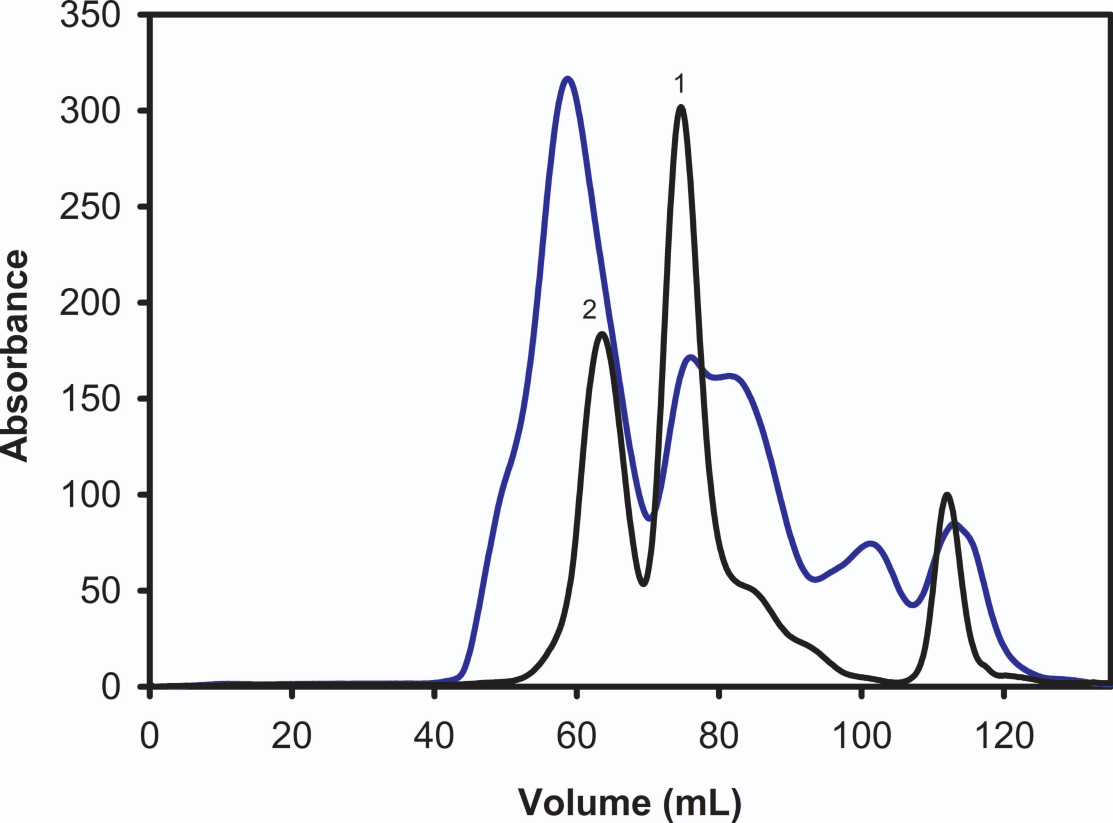

**A**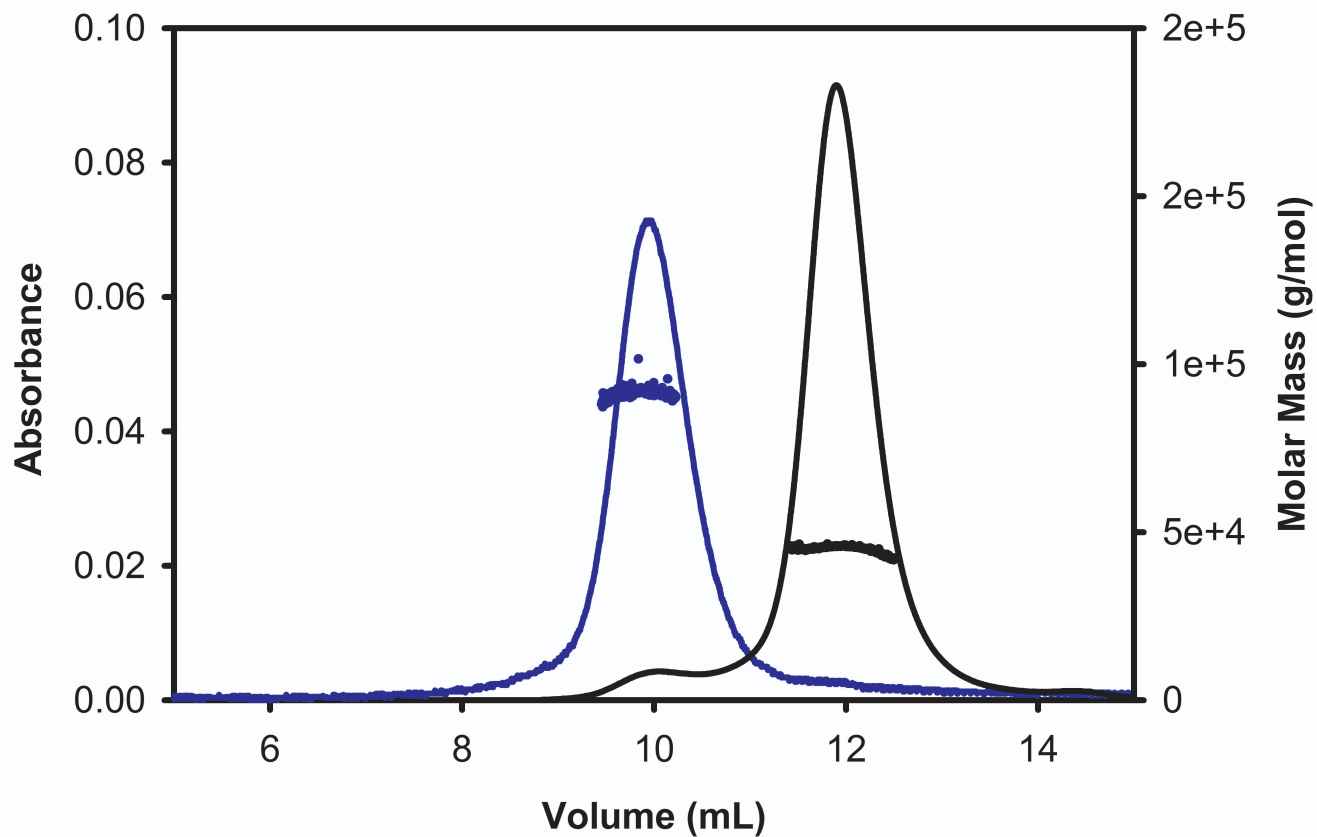**B**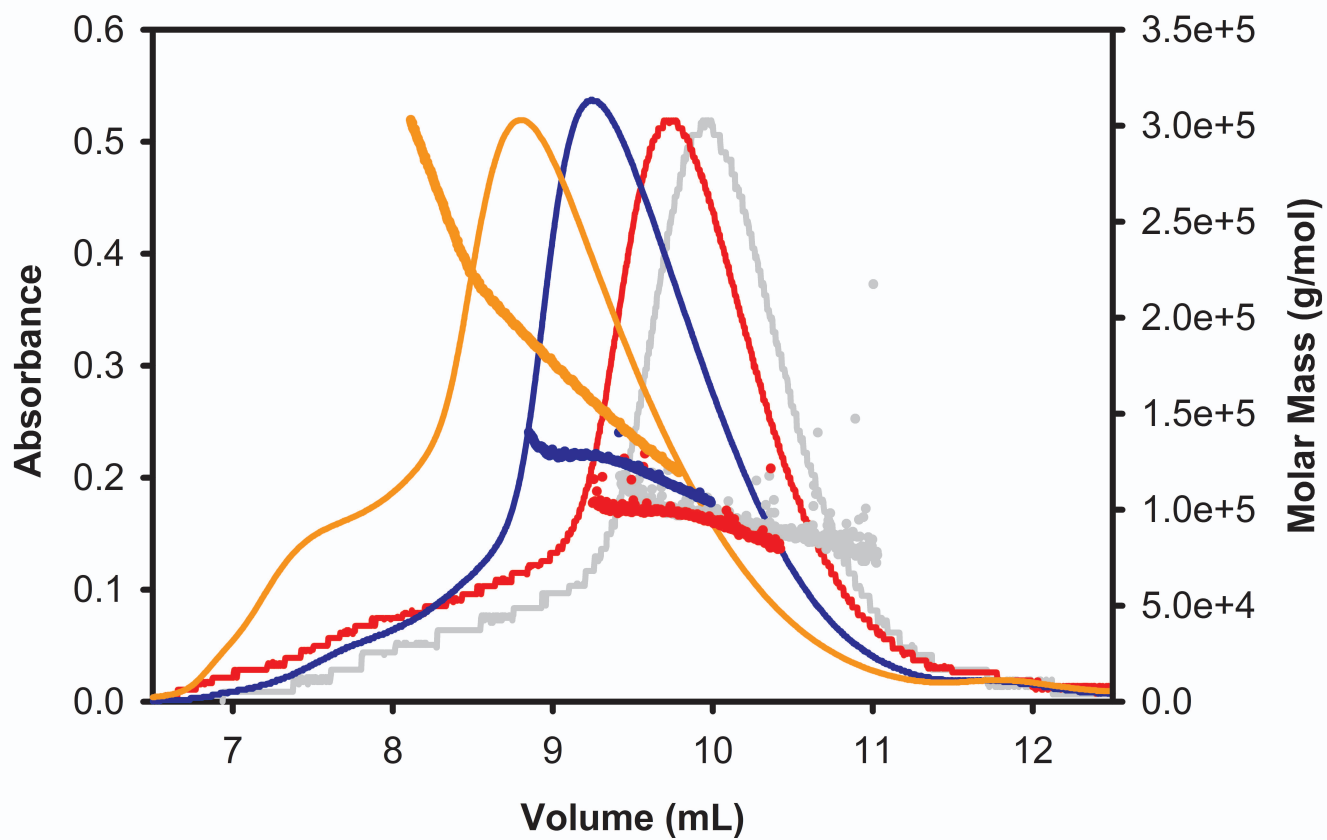

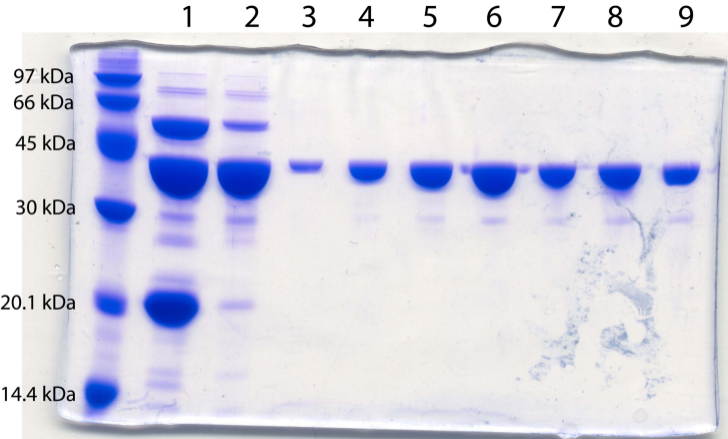

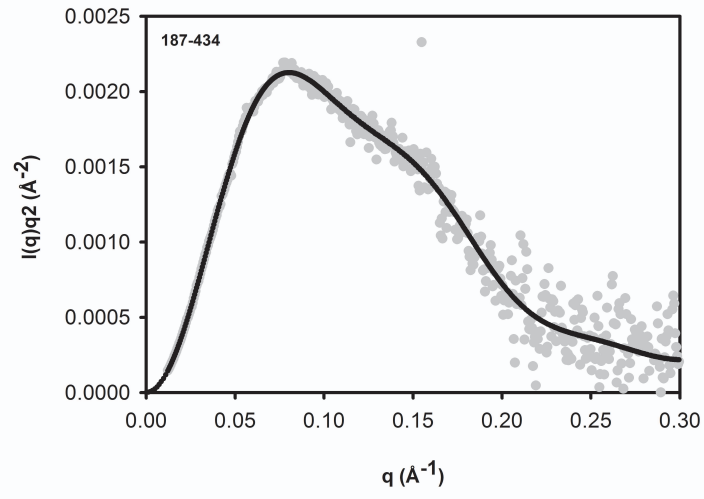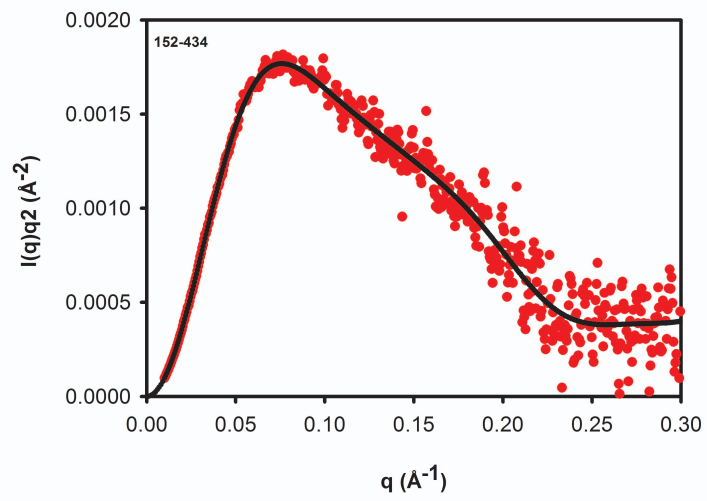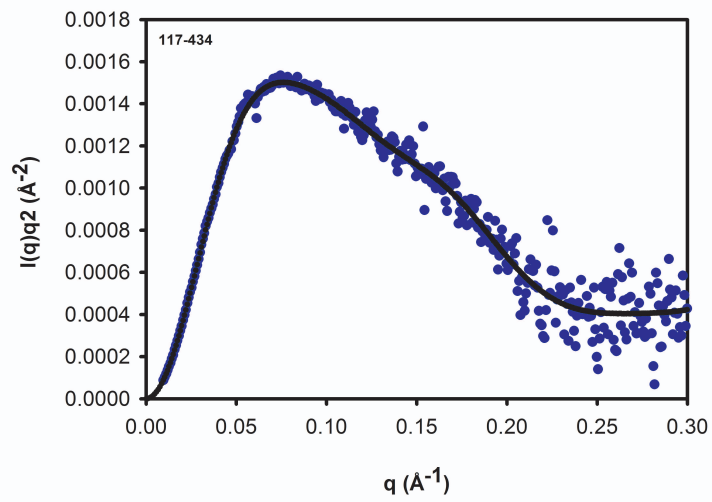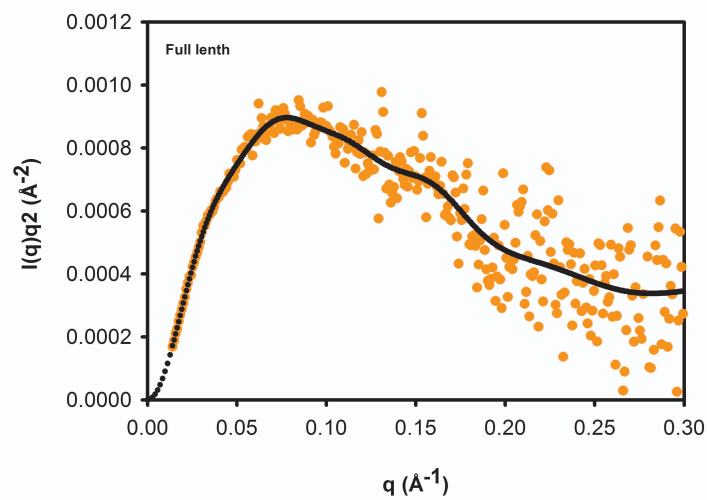

Supplement: NIHMS371135-supplement-Supp_Fig_S1-S5.pdf [file NIHMS371135-supplement-Supp_Fig_S1-S5.pdf]
